# Supplementary material for: Intestinal Microbial and Metabolite Profiling of Mice Fed with Dietary Glucose and Fructose
Source: Preprints.org preprint supplement (doi:10.20944/preprints201801.0210.v1), 2018-01-23
Supplement: Supplementary file 2 [file Table S2.docx]

|  | Week | | | | |
| --- | --- | --- | --- | --- | --- |
|  | 2 | 4 | 6 | 8 | 10 |
| Total Bacteria | Normal Chow | | | | |
| 9,578E+12  1,564E+13  1,046E+12  9,911E+11  2,178E+13  2,066E+13 | 2,013E+13  9,107E+11  5,561E+12  ----------  4,592E+11  3,345E+12 | 3,232E+12  1,066E+13  9,437E+11  8,022E+11  1,091E+12  6,329E+11 | 9,017E+11  5,386E+11  1,201E+12  5,726E+11  1,411E+12  5,379E+11 | 4,794E+10  ----------  2,537E+10  8,240E+10  3,429E+10  ---------- |
| High Glucose | | | | |
| 2,02E+12  1,23E+12  ----------  ----------  5,17E+12  ---------- | 1,862E+12  2,032E+12  1,130E+12  6,671E+12  9,965E+11  1,432E+13 | 1,938E+12  1,388E+12  1,521E+12  2,936E+12  5,311E+11  1,049E+13 | ----------  5,429E+12  4,414E+12  2,655E+13  ----------  5E+11 | ----------  2,847E+10  2,240E+10  1,136E+10  1,151E+10  7,577E+10 |
| High Fructose | | | | |
| 2,265E+12  1,776E+12  7,296E+11  6,654E+11  9,116E+12  ---------- | 1,438E+13  5,571E+12  1,327E+12  1,696E+13  7,614E+11  6,654E+11 | 6,697E+11  6,577E+11  1,023E+12  2,352E+13  1,359E+13  1,112E+12 | 1,966E+12  1,494E+12  1,729E+12  9,208E+11  2,320E+12  7,707E+11 | 1,018E+10  6,598E+09  1,303E+10  9,933E+09  9,268E+09  7,161E+09 |
| % Enterobacteria | Normal Chow | | | | |
| 2,121E-04  6,572E-05  4,479E-04  1,426E-03  1,474E-04  1,448E-04 | 2,418E-04  1,264E-01  7,659E-04  ----------  4,146E-02  4,994E-04 | 7,250E-05  9,670E-05  8,015E-02  4,373E-02  7,069E-03  9,021E-03 | 3,286E-03  2,004E-04  2,332E-04  7,614E-03  3,717E-03  9,285E-03 | 2,323E-04  ----------  6,861E-03  5,133E-01  2,165E-02  ---------- |
| High Glucose | | | | |
| 2,300E-04  6,193E-03  ----------  ----------  5,906E-03  ----------  ---------- | 1,592E-02  6,805E-04  2,509E-04  1,714E-04  1,928E-02  3,860E-04  ---------- | 2,667E-02  3,813E-05  7,515E-03  1,128E-03  8,743E-04  6,588E-06  ---------- | ----------  6,220E-03  5,095E-04  1,248E-04  ----------  2,571E-01  ---------- | ----------  2,358E-03  6,226E-04  1,893E-01  3,044E-02  1,481E-02  ---------- |
| High Fructose | | | | |
| 6,555E-04  3,072E-02  5,624E-05  3,645E-03  1,913E-04  ---------- | 3,568E-04  1,487E-04  3,509E-03  1,533E-05  5,059E-03  6,919E-03 | 6,524E-02  7,537E-01  2,682E-02  1,024E-04  1,878E-04  1,437E-02 | 3,009E-03  1,125E-03  4,017E-03  2,613E-03  2,239E-04  5,731E-03 | 1,741E-01  1,844E-02  1,287E-01  4,126E-02  9,725E-02  1,168E-01 |
| % Lactobacillus | Normal Chow | | | | |
| 3,153E-03  7,965E-03  4,826E-02  6,226E-01  2,191E-02  5,255E-02 | 1,484E-03  2,789E-02  1,300E-02  ----------  1,729E-02  5,411E-02 | 1,256E-01  2,256E-02  2,084E-01  2,272E-01  2,935E-01  5,616E-01 | 1,628E-01  2,512E-01  1,015E-01  8,595E-01  4,321E-01  1,087E-01 | 2,771E-02  ----------  5,432E-02  1,331E-03  5,783E-03  ---------- |
| High Glucose | | | | |
| 2,199E-02  4,704E-01  ----------  ----------  4,131E-01  ---------- | 1,102E-01  1,153E+00  3,171E-01  1,046E-01  5,453E+00  2,388E-02 | 2,601E-02  2,367E-02  9,000E-02  9,720E-03  1,084E-01  6,237E-05 | ----------  2,761E-02  9,793E-02  6,342E-03  ----------  6,565E-02 | ----------  1,825E-02  1,471E-02  3,156E-02  6,181E-02  1,191E-01 |
| High Fructose | | | | |
| 3,939E-03  8,149E-02  4,509E-01  7,745E-02  3,997E-03  ---------- | 1,770E-03  6,061E-03  2,862E-03  1,614E-03  1,485E-01  2,673E-02 | 1,713E-01  1,549E-02  1,401E-02  1,318E-02  1,294E-02  7,729E-02 | 5,976E-02  7,070E-02  1,986E-02  8,862E-01  9,392E-03  1,309E-01 | 4,785E-01  2,940E-02  1,328E-01  2,406E-01  5,190E-01  1,646E-01 |
